# Supplementary material for: Simultaneous and visual detection of multiple dopes by an aptamer/AuNPs sensor
Source: Royal Society of Chemistry journal article supplement (doi:10.1039/d2nj03938a), 2022-01-01
Supplement: d2nj03938a6.pdf [file d2nj03938a6.pdf]

## Supporting Information

### **Simultaneous and Visual Detection for Multiple Dopes by Aptamer/AuNPs**

#### **Sensor**

*Xuancheng Fu* †,<sup>a,b</sup> *Miaomiao Gou* †,<sup>c</sup> *Yong Zhang* †,<sup>d</sup> *Hao Su*,<sup>a</sup> *Haotian Zhao*,<sup>a</sup> *Chang Liu*,  
<sup>a,b\*</sup> and *Jing Han*<sup>e\*</sup>

<sup>a</sup> School of Sport Science, Beijing Sport University, Beijing 100084, China.

<sup>b</sup> Institute of Anti-Doping in China, Beijing Sport University, Beijing 100084, China.

<sup>c</sup> The Fifth Medical Center, Chinese PLA General Hospital, Beijing 100853, China.

<sup>d</sup> The Second Medical Center, Chinese PLA General Hospital, Beijing 100853, China.

<sup>e</sup> Beijing National Laboratory for Molecular Sciences, Institute of Chemistry Chinese

Academy of Sciences, Beijing, 100190, China

Email: [changliu.epigenetic@gmail.com](mailto:changliu.epigenetic@gmail.com)

[jinghan@iccas.ac.cn](mailto:jinghan@iccas.ac.cn)

## **MATERIALS AND METHODS**

**Materials and Instruments.** All organic solvents were obtained from Beijing Chemical Works and used as received. Dexamethasone, salbutamol, and ractopamine were purchased from ehrenstorfte. Glucose, fructose, salidoside, tetrachloroauric(III) acid trihydrate, and sodium citrate were purchased from J&K Scientific Ltd. All chemicals were used without further purification. All of the oligonucleotides used in this paper were synthesized by Sangon Biotechnology Inc. (Shanghai, China). The UV-Vis absorption spectra were recorded via a Thermo Scientific Varioskan LUX. The dynamic light scattering (DLS) was recorded with Malvern Zetasizer Nano ZS90. Hitachi HT7700 transmission electron microscopy (TEM) was employed to determine the morphology of AuNPs before and after aggregation.

Dex aptermer sequence: 5' -ACACGACGAGGGACGAGGAGTACTTGCCAACGA  
TAACGTCGTTGGATCTGTCTGTGCCC-3'

Sal aptermer sequence: 5'-AGCAGCACAGAGGTCAGATGT  
TGTAAAACTTAATCAGCGATTCTCTATGTCTGCAATTACCCTATGCGTGCTA  
CCGTG-3'

Rac aptermer sequence: 5'-AGTGCGGGC-3'

**Preparation of AuNPs.** The citrate-protected gold nanoparticles were prepared according to reported procedures. Briefly, 50 mL of 1 mM HAuCl<sub>4</sub> was brought to boil with vigorous stirring. Sodium citrate (38.8 mM, 5 mL) was rapidly poured to the vortex of the solution, which result a color change of solution from pale yellow to a wine-red solution. After continuously boiling for 10 min, the solution was cooled to room temperature. Finally, the AuNPs was obtained by filtering through a 0.45- $\mu$ m membrane

filter, and characterized by UV/Vis spectrometry, dynamic light scattering (DLS), and transmission electron microscopy (TEM).

**Optimization of NaCl Concentration.** 20  $\mu\text{L}$  milli-Q water was mixed with 70  $\mu\text{L}$  AuNPs. Then, different concentration of NaCl solution (0, 0.5, 1, 1.5, 2, 3, 5 M) at the volume of 10  $\mu\text{L}$  was added. After co-incubated for 5 min in 96-well plate, the  $A_{650}/A_{520}$  ratio in absorption spectrum was recorded. As shown in Figure S1, 0.5 M NaCl could induce the total aggregation of AuNPs. Therefore, 0.5 M of NaCl was selected as the suitable salt concentration.

**Optimization of Dxm-aptamer, Sal-aptamer, and Rac-aptamer Concentration during single dope detection.** 10  $\mu\text{L}$  mill-Q was pre-mixed with different concentration of aptamer (0, 1, 2, 3, 4, 5, 6, 7, 8, 9, 10  $\mu\text{M}$ ) at a volume of 10  $\mu\text{L}$ . Then, 70  $\mu\text{L}$  AuNPs were added into solution, and co-incubated for 15 min. Finally, NaCl (0.5 M, 10  $\mu\text{L}$ ) were added into each well and co-incubated for another 5 min. According to the results of  $A_{650}/A_{520}$  ratio from absorption spectrum, the minimum concentration of aptamers to prevent the aggregation of AuNPs was the optimal salt concentration.

**Procedures of detection of Dxm, Sal and Rac during single dope detection.** Aptamer (10  $\mu\text{L}$ ) and target dope (10  $\mu\text{L}$ ) were mixed and incubated for 20 min. Then, 70  $\mu\text{L}$  AuNPs were added into supernatant. Finally, NaCl (0.5 M, 10  $\mu\text{L}$ ) was added to mixtures, following the monitoring using UV/Vis spectrometer.

**Optimization of mixed-aptamers Concentration during multi-dopes detection.** Dxm-aptamer (10  $\mu\text{M}$ ), Sal-aptamer (10  $\mu\text{M}$ ), and Rac-aptamer (10  $\mu\text{M}$ ) were pre-mixed with 1:1:1 (v/v/v). 10  $\mu\text{L}$  milli-Q water was pre-mixed with different concentration of mix-aptamer (0, 1, 2, 3, 4, 5, 6, 7, 8, 9, 10  $\mu\text{M}$ ; 10  $\mu\text{L}$ ). Then, the AuNPs (70  $\mu\text{L}$ ) was added and incubated for 15 min. After the introduction of NaCl solution (0.5 M, 10  $\mu\text{L}$ ) and co-incubation, the absorption spectrum was recorded via spectrophotometer. The

concentration of mix-aptamers, which could totally prevent the aggregation of AuNPs, was the suitable concentration.

**Procedures of detection of Dxm, Sal and Rac during multi-dopes detection.** Similar to the process of “Procedures of detection of Dxm, Sal and Rac during single dope detection”, target dopes (10  $\mu\text{L}$ ) were added into the solution of mixed-aptamers (10  $\mu\text{L}$ ). After 20 min co-incubation, AuNPs (70  $\mu\text{L}$ ) was added and incubated for another 15 min. Then, NaCl (0.5 M, 10  $\mu\text{L}$ ) was added into the mixtures, following 5 min incubation. All results were recorded by UV/Vis spectromer and camera.

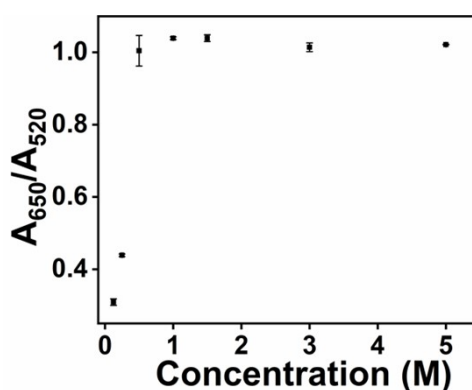

**Figure S1.** The  $A_{650}/520$  nm of supernatant under various concentrations of NaCl.

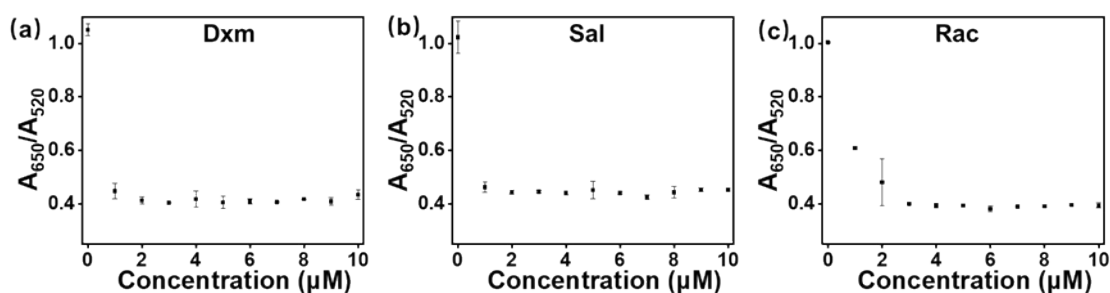

**Figure S2.** The  $A_{650}/520$  ratio of supernatant under various concentrations of aptamer: (a) Dxm, (b) Sal and (c) Rac.

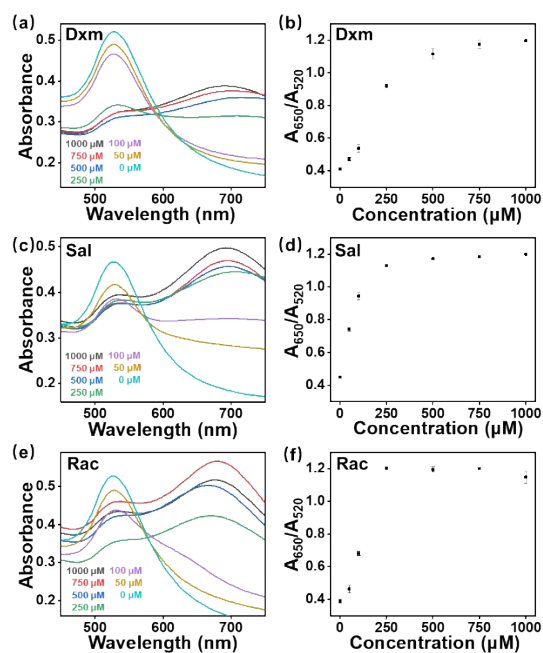

**Figure S3.** Single-functional Aptamer/AuNPs sensor for dopes detection. Scanning spectroscopy after adding different concentrations of (a) Dex, (c) Sal and (e) Rac and the corresponding (b) Dex, (d) Sal and (f) Rac  $A_{650}/A_{520}$  ratios.

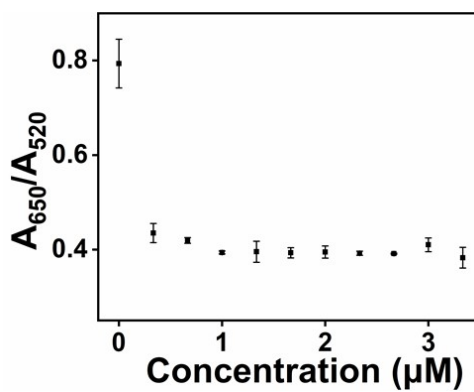

**Figure S4.** The  $A_{650}/A_{520}$  ratio of supernatant under various concentrations of the mixed solution of Dex, Sal and Rac aptamers.

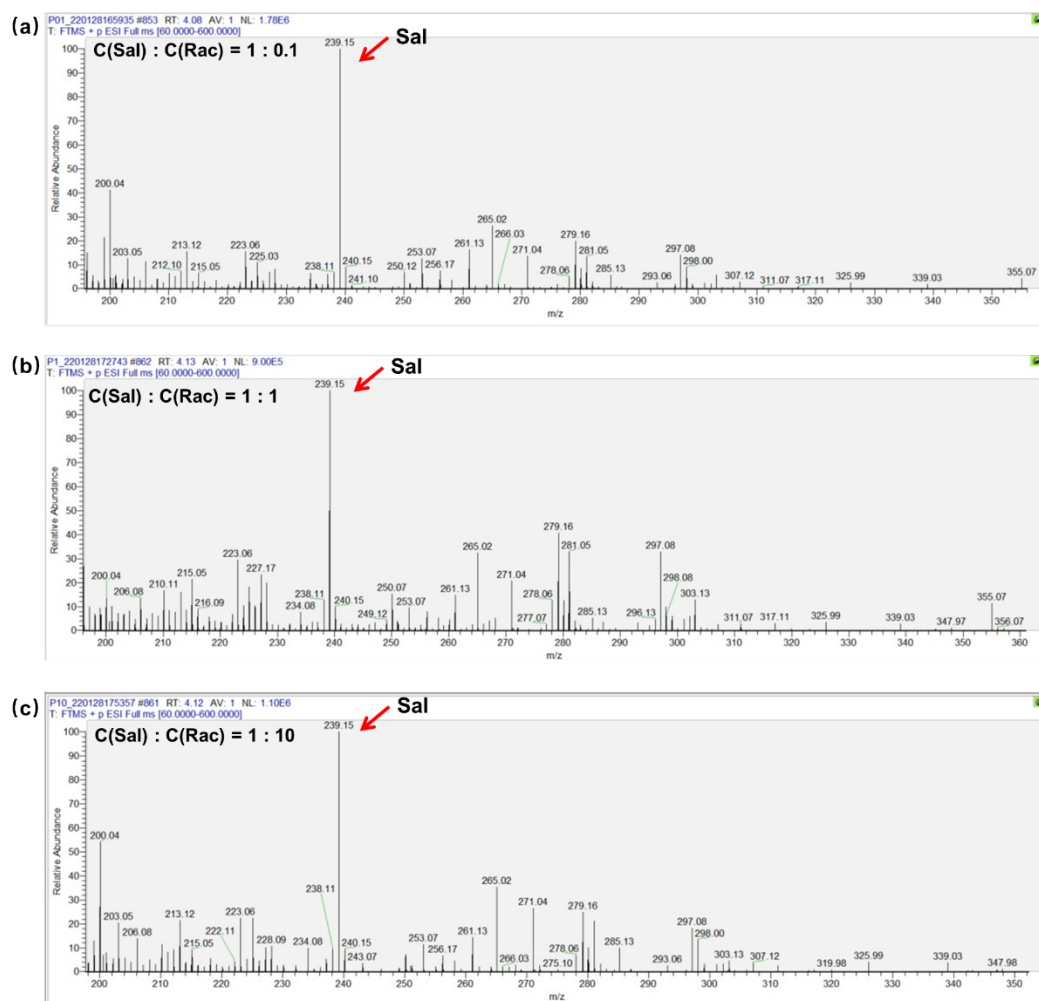

**Figure S5.** LC-MS results of Sal and Rac in different ratio. The concentration of Sal was set as 10  $\mu\text{M}$ .

| Method                                  | Linear range ( $\mu\text{M}$ ) | Limit of Detection ( $\mu\text{M}$ ) | Reference |
|-----------------------------------------|--------------------------------|--------------------------------------|-----------|
| MWCNTs-modified Pencil Electrode        | 0.15–100                       | 0.09                                 | 42        |
| Differential Pulse Voltammetry          | 26-122                         | 7.6                                  | 43        |
| GO/GCE Differential Pulse Voltammetry   | 0.1–50                         | 0.076                                | 44        |
| edge plane pyrolytic graphite electrode | 0.07-100                       | 0.06                                 | 45        |
| Multifunctional Aptamer/AuNP Biosensor  | 0.1-10                         | 0.053                                | This Work |

**Table S1.** Comparison of majority reported methods for the detection of Dxm.

| Method                                 | Linear range ( $\mu\text{M}$ ) | Limit of Detection ( $\mu\text{M}$ ) | Reference |
|----------------------------------------|--------------------------------|--------------------------------------|-----------|
| Spectrophotometry                      | 1.73-20                        | 0.17                                 | 46        |
| Chromatography                         | 1.73–5.00                      | 0.29                                 | 47        |
| Capillary electrophoresis              | 70–300                         | 10                                   | 48        |
| MWCNT/GCE                              | 0.80–10                        | 0.20                                 | 49        |
| Multifunctional Aptamer/AuNP Biosensor | 0.5-100                        | 0.13                                 | This Work |

**Table S2.** Comparison of majority reported methods for the detection of Sal.

| Method                                 | Linear range ( $\mu\text{M}$ ) | Limit of Detection ( $\mu\text{M}$ ) | Reference |
|----------------------------------------|--------------------------------|--------------------------------------|-----------|
| Chemiluminescence                      | 0.059-0.296                    | 0.014                                | 50        |
| High-performance Liquid Chromatography | 200-20000                      | 50                                   | 51        |
| Electrochemistry                       | 0.1–380                        | 50                                   | 52        |
| Gas chromatography–mass Spectrometry   | 0.073-0.591                    | 0.059                                | 53        |
| Multifunctional Aptamer/AuNP Biosensor | 0.05-10                        | 0.011                                | This Work |

**Table S3.** Comparison of majority reported methods for the detection of Rac.

| Sample | Added ( $\mu\text{M}$ ) | Found ( $\mu\text{M}$ ) | Recovery (%) | RSD (%) |
|--------|-------------------------|-------------------------|--------------|---------|
| Dxm 1  | 0.1                     | 0.102                   | 102          | 12.3    |
| Dxm 2  | 1                       | 0.920                   | 92           | 2.27    |
| Dxm 3  | 10                      | 11.1                    | 111          | 12.8    |
| Sal 1  | 0.5                     | 0.510                   | 102          | 3.77    |
| Sal 2  | 1                       | 0.990                   | 99           | 3.76    |
| Sal 3  | 10                      | 10.0                    | 100          | 3.06    |
| Rac 1  | 0.1                     | 0.118                   | 118          | 2.08    |
| Rac 2  | 1                       | 0.93                    | 93           | 3.05    |
| Rac 3  | 10                      | 11.3                    | 113          | 2.32    |

**Table S4.** Recoveries and RSD results based on multifunctional aptamer/AuNPs sensor for determination of Dxm, Sal and Rac in urine samples.
