# Supplementary figures and images for: Simultaneous and visual detection of multiple dopes by an aptamer/AuNPs sensor
Source: Royal Society of Chemistry journal article supplement (doi:10.1039/d2nj03938a), 2022-01-01

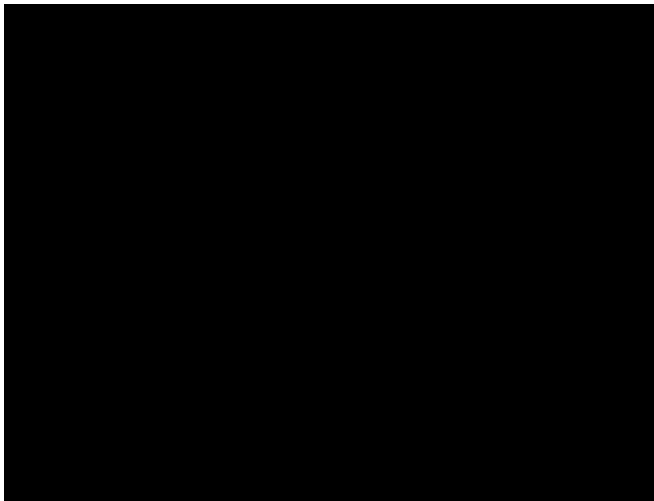

Supplement: d2nj03938a2.pdf [file d2nj03938a2.pdf]

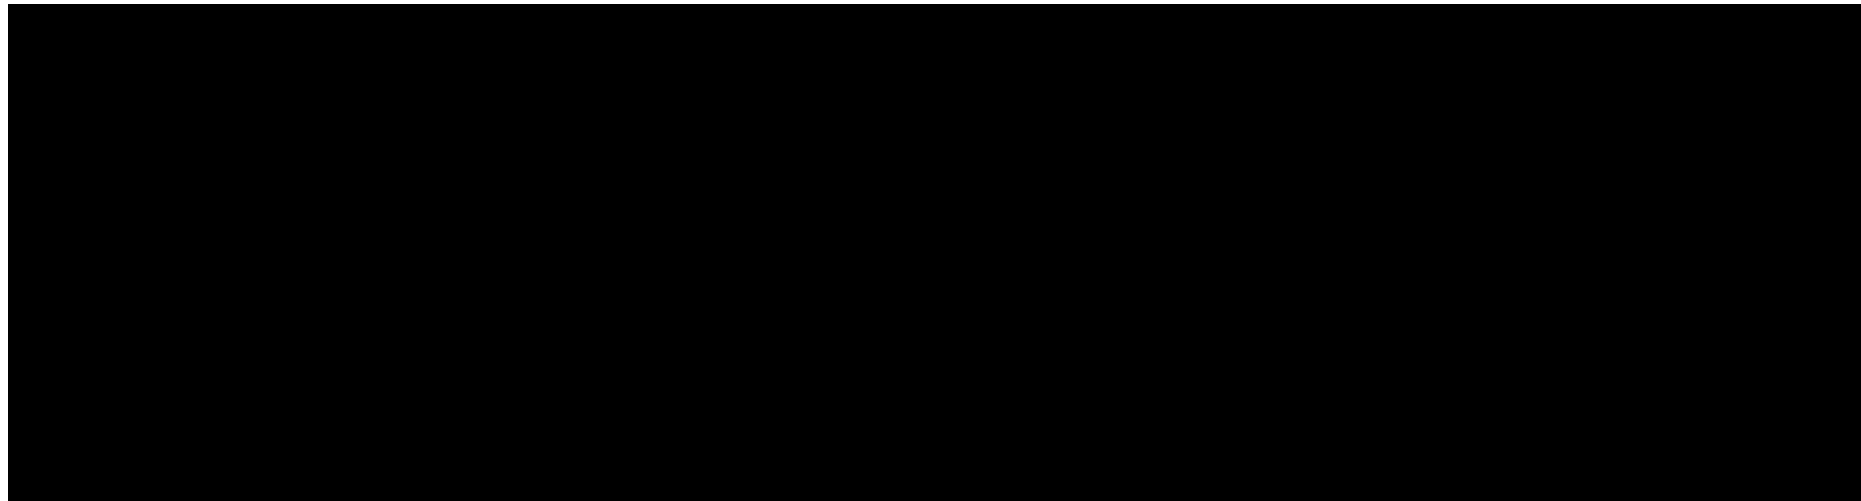

Supplement: d2nj03938a3.pdf [file d2nj03938a3.pdf]

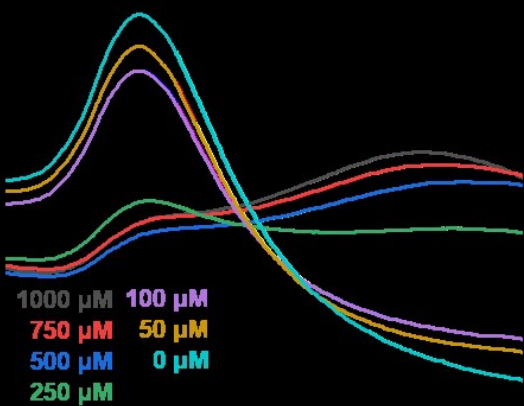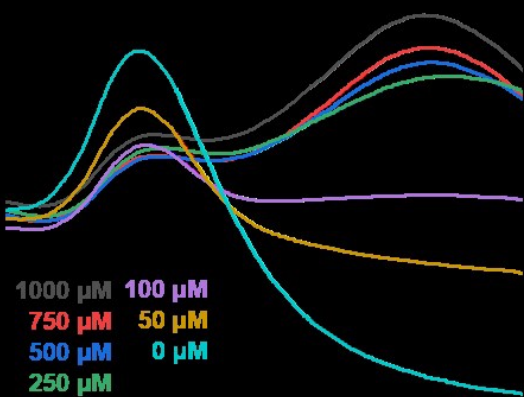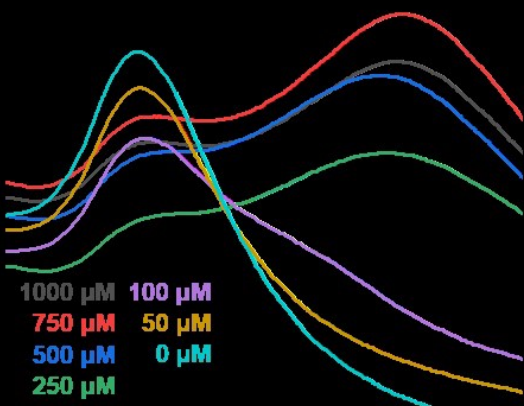

Supplement: d2nj03938a4.pdf [file d2nj03938a4.pdf]

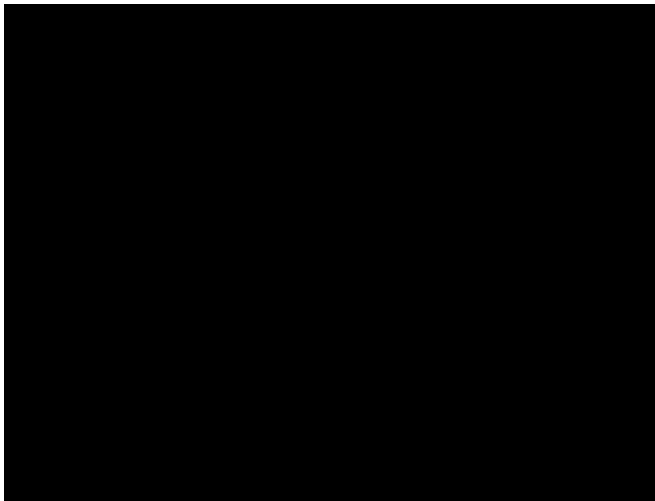

Supplement: d2nj03938a5.pdf [file d2nj03938a5.pdf]
